# Supplementary material for: Probiotics' effects on the incidence of nosocomial pneumonia in critically ill patients: a systematic review and meta-analysis
Source: Springer Nature journal article supplement (doi:10.1186/cc11398), 2012-06-25
Supplement: 13054_2011_655_MOESM3_ESM.pdf [file 13054_2011_655_MOESM3_ESM.pdf]

Potential relevant published articles

identified: (n=131)

84 excluded for the following reasons: review articles/meta-analysis/comments and editorials/ Letter to editor/ case reports/

Articles retrieved for more detailed

evaluation: ( n=47 )

**25** excluded for the following reasons:  
Not a randomized controlled study ( n=3 )  
Evaluating in animal experiments ( n=13 )  
Pediatric study ( n=9 )

Articles meeting inclusion criteria for this

meta-analysis: ( n=22 )

**10** excluded for the following reason:  
Not relevant to the main outcome ( n=5 )  
Population not critically ill ( n=3 )  
Inappropriate control group ( n=2 )

Articles included in this meta-analysis: **12**
